# Supplementary material for: Exploring facet-engineered anatase nanoparticles for amplification of sensitivity in heavy metal ion detection and other applications
Source: Royal Society of Chemistry journal article supplement (doi:10.1039/d5ma00760g), 2025-12-03
Supplement: d5ma00760g1.pdf [file d5ma00760g1.pdf]

## **Exploring the Facet-engineered Anatase Nanoparticles for amplification of Sensitivity in Heavy Metal Ion Detection and Other Applications**

**Md. Anayet Ullah<sup>a,b</sup>, Fataha Nur Robel<sup>b</sup>, Newaz Mohammed Bahadur<sup>c</sup>, Dipa Islam<sup>d</sup>, Subarna Shandani dey<sup>e</sup>, Samina Ahmed<sup>a\*</sup>, and Md. Sahadat Hossain<sup>a\*</sup>**

<sup>a</sup>Institute of Glass & Ceramic Research and Testing, Bangladesh Council of Scientific and Industrial Research (BCSIR), Dhaka 1205, Bangladesh

<sup>b</sup>Department of Applied Chemistry and Chemical Engineering, Noakhali Science and Technology University, Noakhali, Bangladesh

<sup>c</sup>Department of Chemistry, Noakhali Science and Technology University, Noakhali 3814, Bangladesh

<sup>d</sup>Biomedical and Toxicological Research Institute, Bangladesh Council of Scientific and Industrial Research (BCSIR), Dhaka 1205, Bangladesh

<sup>e</sup>Institute of Food Science and Technology, Bangladesh Council of Scientific and Industrial Research (BCSIR), Dhaka 1205, Bangladesh

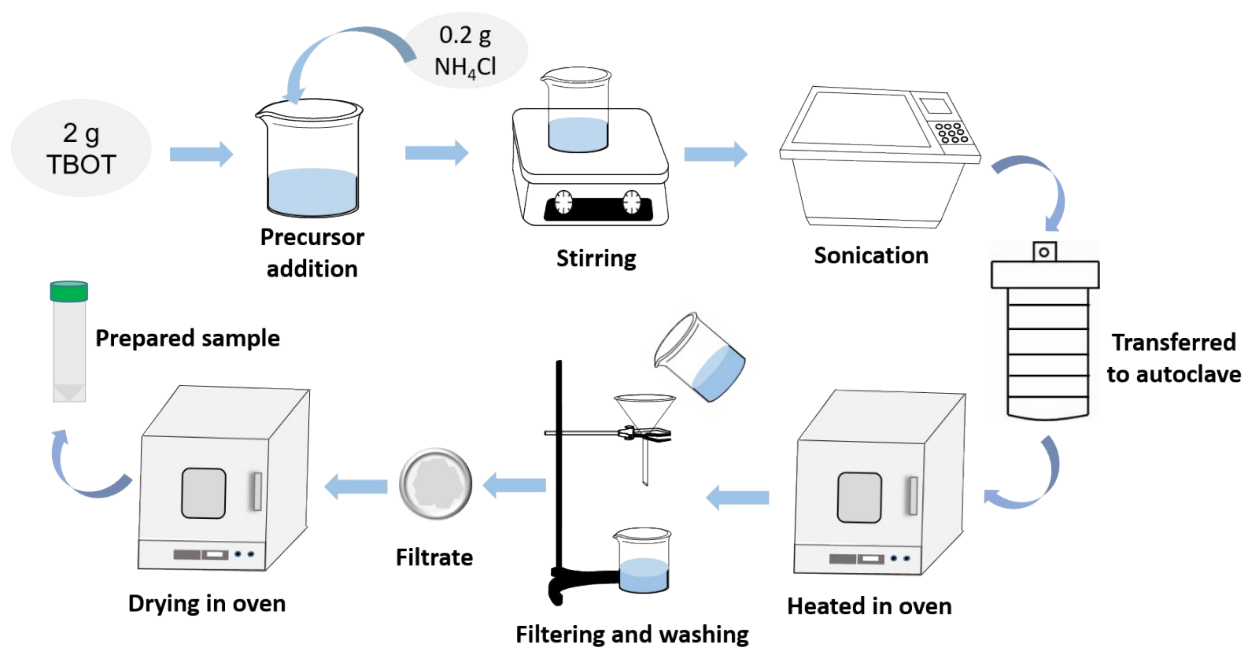

Figure S1: Schematic depiction of the synthesis procedure of {101}-faceted  $\text{TiO}_2$ .

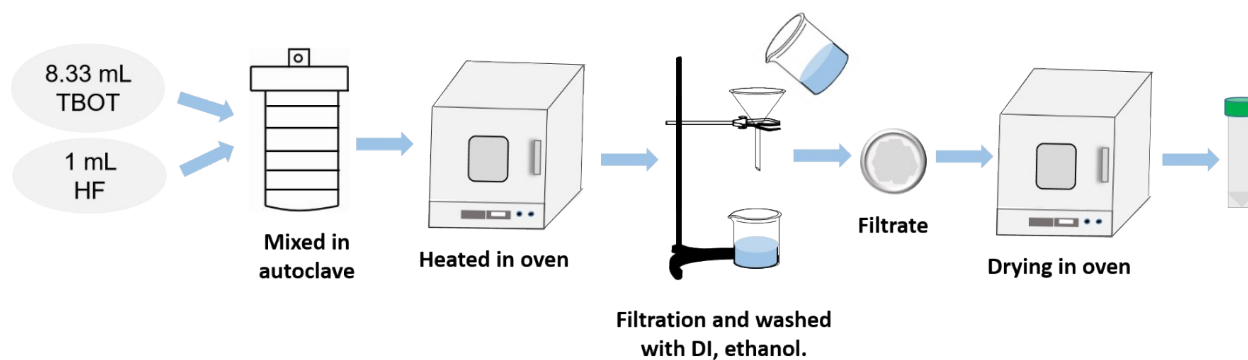

Figure S2: Schematic depiction of the synthesis procedure of {001}-faceted  $\text{TiO}_2$ .

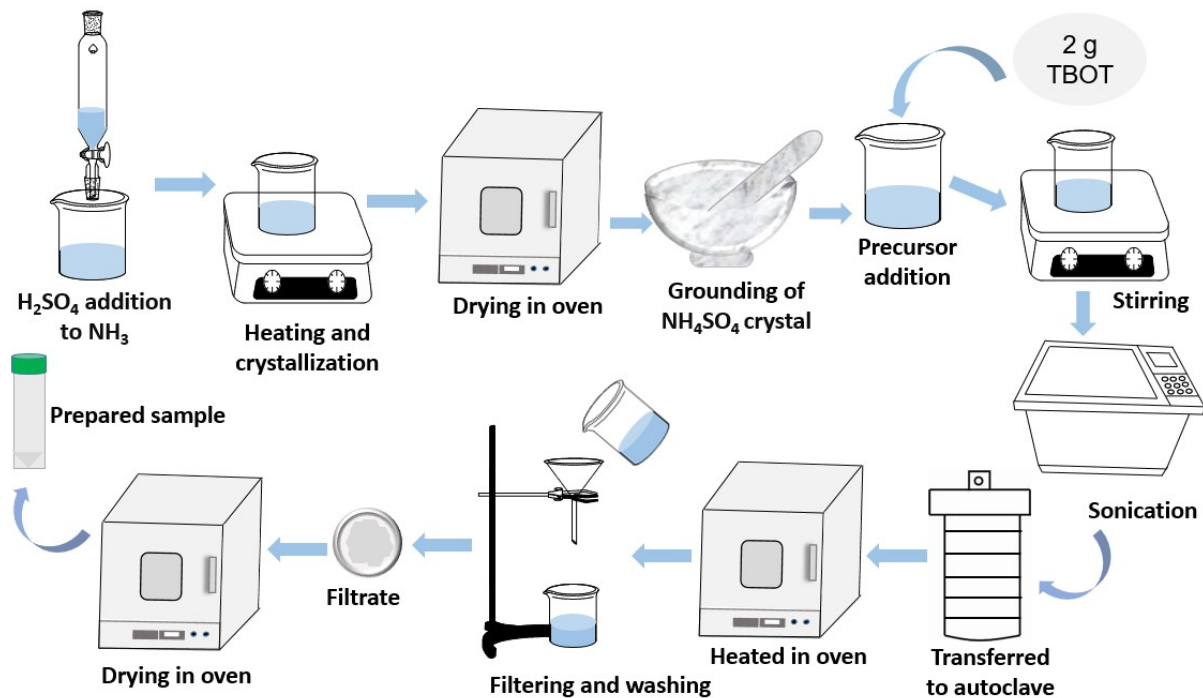

**Figure S3: Schematic depiction of the synthesis procedure of {101}/{001} co-faceted TiO<sub>2</sub>.**

$$\text{Lattice parameter, } \frac{1}{(d_{hkl})^2} = \left( \frac{h^2 + k^2}{a^2} \right) + \frac{l^2}{c^2} \quad (\text{E1})$$

$$\text{Crystallite size, } D = \frac{K\lambda}{\beta \cos \theta} \quad (\text{E2})$$

$$\text{Dislocation density, } \delta = \frac{1}{(\text{Crystallite size})^2} \quad (\text{E3})$$

$$\text{Microstrain, } \epsilon = \frac{FWHM}{4 \tan(\theta)} \quad (\text{E4})$$

$$\text{Crystallinity index} = \frac{H(004) + H(200) + H(105)}{H(101)} \quad (\text{E5})$$

Here, D = size of crystallite; K = 0.9 = shape factor; h, k, and l = planes of the unit cell;  $\lambda$  = wavelength,  $\theta$  = diffraction angle (degree),  $d_{hkl}$  = interplanar distance,  $\beta$  (in radian) = FWHM = full width at half maximum; H = height of the correlating plane's peak.

$$\text{Relative intensity} = \frac{I_{(101)}}{I_{(004)} + I_{(200)} + I_{(105)}} \quad (\text{E6})$$

$$\text{Preference growth} = \frac{\text{Relative intensity}_{\text{sample}} - \text{Relative intensity}_{\text{standard}}}{\text{Relative intensity}_{\text{standard}}} \quad (\text{E7})$$

$$\text{Texture coefficient, } T_C = \frac{I/I_o}{N^{-1}} \left( \sum_n I/I_o \right)^{-1} \quad (\text{E8})$$

In this context, N represents the number of reflections,  $I_o$  signifies the average intensity of the plane as obtained from the JCPDS data, and I refers to the relative intensity of a specific plane as observed.

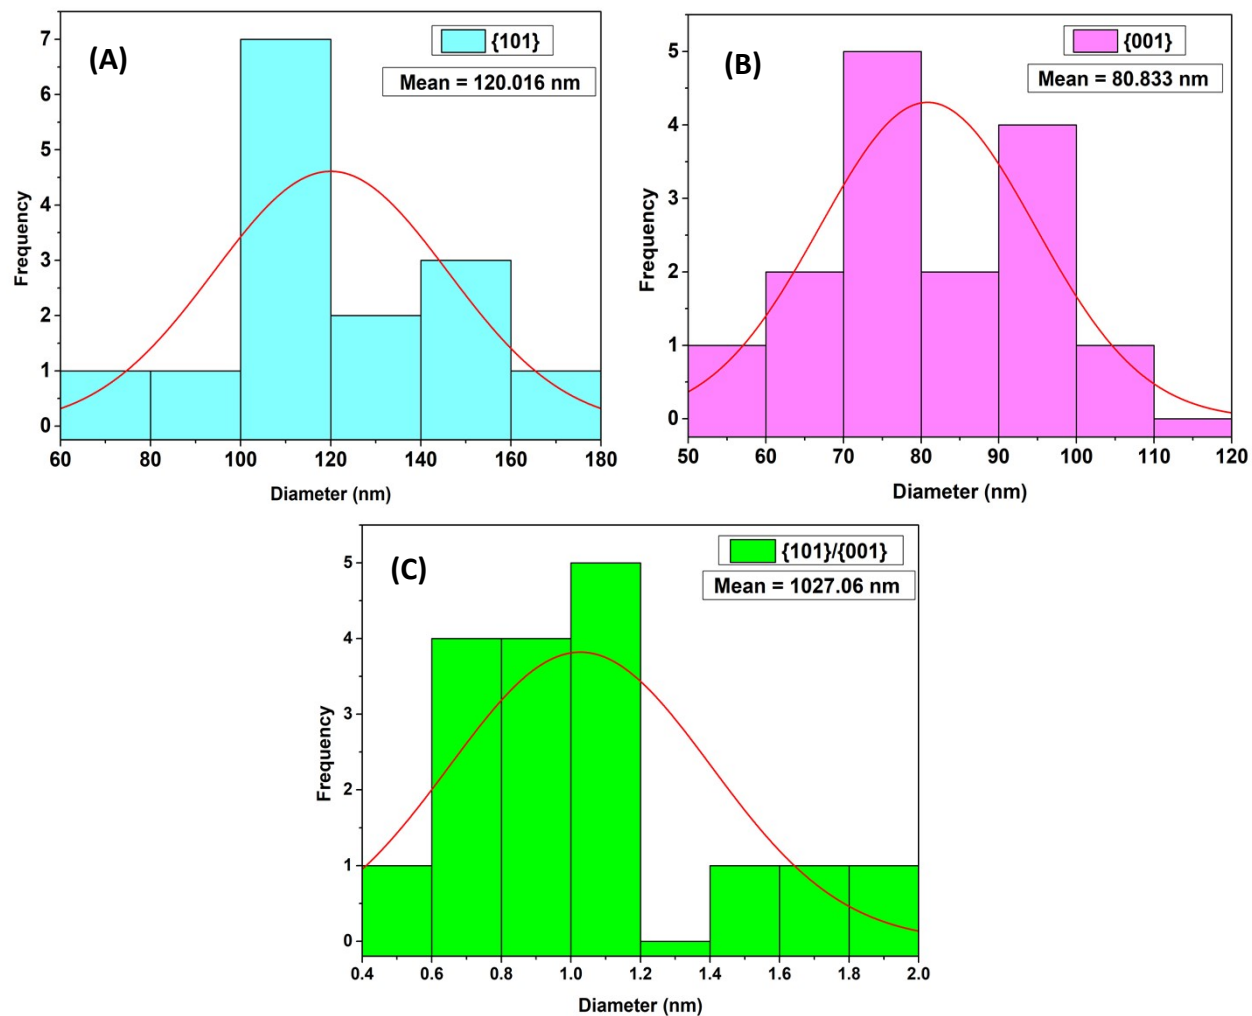

**Figure S4: Histogram analysis of the synthesized {101}-faceted, {001}-faceted and {101}/{001} co-faceted TiO<sub>2</sub> samples.**

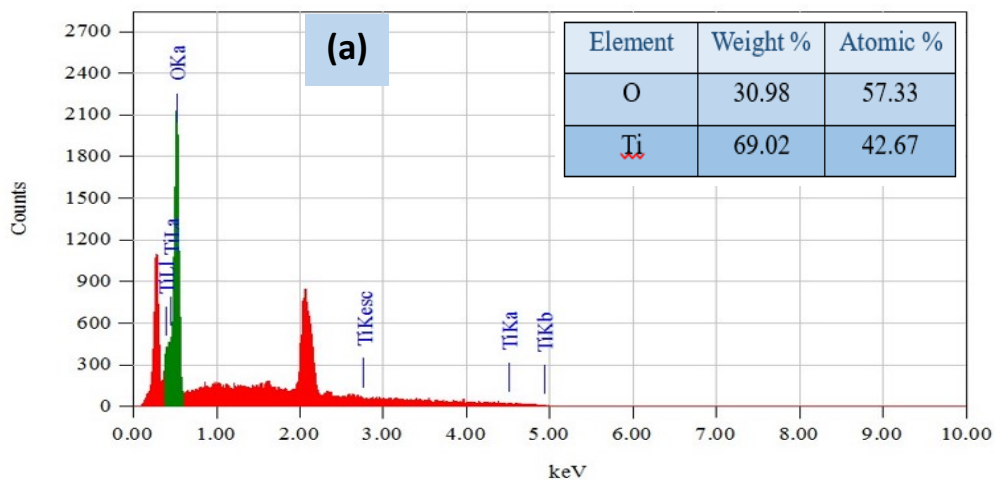

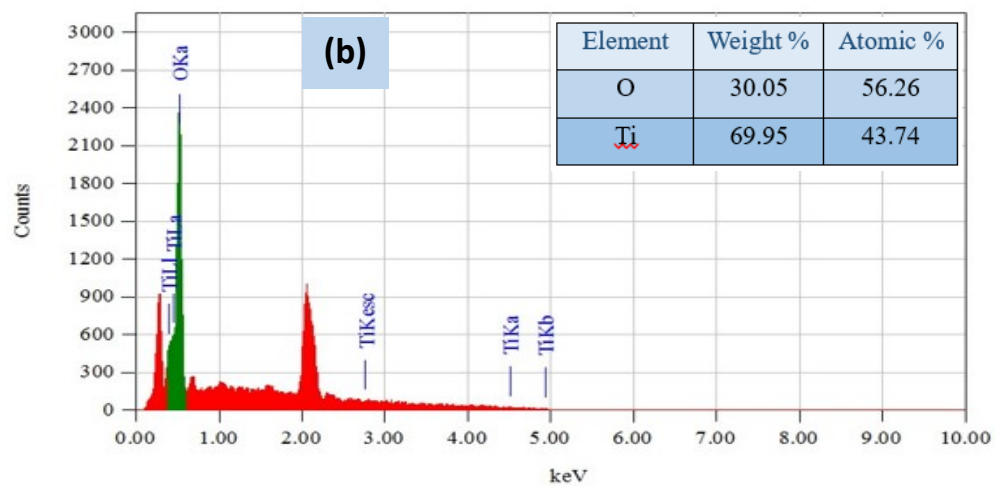

**Figure S5: EDX spectra with elemental mapping of the synthesized (a) {101}-faceted (b) {001}-faceted  $\text{TiO}_2$  samples**
